# Supplementary material
Source: HighWire-hosted journal article supplement (https://bmjopen.bmj.com/content/11/8/e053395)
Supplement: inline-supplementary-material-1 [file inline-supplementary-material-1.pdf]

*Participant Survey*

What age group do you belong to?

- 18-20
  - 21-25
  - 26-30
  - 31-40
  - 41-50
  - 50-65
  - 65+
- 

How long have you been using a smartphone for?

- 0 - 2 years
  - 3 -5 years
  - 6 - 8 years
  - 9 - 10 years
  - More than 10 years
-

Are you currently using an iOS or Android device?

- Android
- iOS
- Other \_\_\_\_\_
- 

What is your gender?

- Male
- Female
- Prefer not to say
- Other \_\_\_\_\_
-

Which region did you spend the majority of your time during the last 30 days?

- London
  - South West England
  - South East England
  - West Midlands
  - East Midlands
  - Eastern England
  - Yorkshire
  - North West England
  - North East England
  - Other \_\_\_\_\_
-

What is your occupation?

- Student
  - Healthcare
  - Armed Forces
  - Office Worker
  - Retail
  - Food and Drink
  - Other \_\_\_\_\_
- 

What is the highest level of education you have achieved?

- PhD
- Master's Degree
- Bachelors Degree
- A Level
- GCSE
- Prefer not to say
- Other \_\_\_\_\_

Do you believe it is necessary for the "NHS COVID-19" app to protect the identities of users?

- Yes
- Undecided
- No
- 

Do you feel the "NHS COVID-19" app is taking more information than required?

- Yes
- Undecided
- No
- 

Do you feel citizens should be legally obligated to download and use the "NHS COVID-19" app?

- Yes
- Undecided
- No
- 

How important is your privacy to you?

- Extremely important
- Moderately important
- Not at all important
-

If you were to test positive for COVID-19, how likely would it be that you would self-report this in the app?

- Very likely
- Neither likely nor unlikely
- Unlikely

Did you download the "NHS COVID-19" app?

- Yes
- No

---

If you did not download the "NHS COVID-19" app, was it for any of the below reasons? (Select all that apply):

- The app was not available for my device
- I did not feel safe downloading this app
- I believe this app will not benefit me
- Due to my place of work
- Other

If applicable for you, would any of the below reasons changed your mind on downloading the app? (Select all that apply):

- If made by an University
  - If made by a Non-for-Profit Organisation other than a University
  - If it was made by a third party for profit
  - If it was completely anonymous
  - If it was downloadable on my device
  - If more information was provided about the app
  - None of the above
- 

How long have you had the "NHS COVID-19" app downloaded on your device

- Under 1 week
  - 1-2 weeks
  - 2-4 weeks
  - 1-2 months
  - Over 2 months
-

Why did you first download the "NHS Covid-19" App?

- I was curious
  - I wanted to help others
  - The marketing campaign convinced me
  - I always follow what the government instructs me to do
  - A friend or family member convinced me to
  - I was told to by a venue I visited
  - Other \_\_\_\_\_
- 

Did the "NHS Covid-19" App meet your Expectations?

- Yes
  - No
- 

Do you find the "NHS Covid-19" App Useful?

- Yes
  - Undecided
  - No
-



Are you still using the "NHS Covid-19" App?

Yes

No

---

Did you ever delete the "NHS Covid-19" app for any reason?

Yes

No

---

Why did you delete the "NHS Covid-19" app?

---

---

---

---

---

How often do you open the "NHS Covid-19" app?

More than once a day

Once day

Once every few days

Once a week

Never

---

Do you always have the "Contact tracing" feature enabled?

- Always
  - More than 50% of the time
  - Less than 50% of the time
  - Never
  - I don't know what that is
- 

Prior to this current lockdown, how many venues (Restaurants, grocery stores, pubs, lectures halls, etc.) do you estimate you would visit in a given week?

- 0
  - Less than 5
  - 5-10
  - 10-15
  - More than 15
-

Prior to this current lockdown, approximately what percentage of these venues, in a given week, did you check into using the "Venue check-in" feature on the app?

- 100%
  - 75%
  - 50%
  - 25%
  - 0%
  - I did not visit any venues
- 

If at any point, you forgot to check into a venue using the "Venue check-in" app feature, were you immediately reminded by a staff member?

- Yes
  - No
  - I used another method to check into the venue
-

Prior to this current lockdown, on a typical day how many venues would you check into using the "Venue check-in" feature on the app?

- 0
  - 1
  - 2
  - 3
  - 4
  - 5 or more
- 

Prior to this current lockdown, approximately how long would you spend at each venue you attended?

- Less than 30 minutes
  - 30 minutes - 1 hour
  - 1-3 hours
  - More than 3 hours
  - I did not visit any venues
-

Generally, how accessible were the NHS QR codes at venues you have attended?

- Always
  - Most of the time
  - About half the time
  - Sometimes
  - Never
  - N/A - I haven't used the QR Codes
- 

Do you believe this app is significantly impacting the performance, and/or reducing the battery life of your device compared to other apps you use?

- Yes
  - Undecided
  - No
-

If you have developed any COVID-19 related symptoms since downloading the "NHS COVID-19" app, did you use the "Check symptoms" feature?

- Yes
  - No, I forgot to use this feature
  - No, I was not aware of this feature
  - No, I did not want to let anyone else know
  - No, I'd rather not say why
  - N/A - I have not developed symptoms since downloading the app
- 

How often did you open the "read latest advice" feature on the "NHS COVID-19" app?

- Daily
  - Once every few days
  - Once a week
  - Once
  - Never
- 

Did you ever experience any technical issues/bugs with the app?

- Yes
  - No
-

What were these issues/bugs? \*OPTIONAL\*

---

---

---

---

---

Did the "NHS COVID-19" app provide adequate background information to fully understand the "Venue check-in" feature?

- Yes, information was adequate
- Neither adequate nor inadequate
- No, information was inadequate
- N/A - I did not use this feature
- 

Did the "NHS COVID-19" app provide adequate instruction on how to self-report a positive COVID-19 test directly from the app?

- Yes, information was adequate
- Neither adequate nor inadequate
- No, information was inadequate
- N/A - I did not use this feature
-

Did the "NHS COVID-19" app provide adequate information on how the system determines if someone you encounter may be registered as a close contact?

- Yes, information was adequate
  - Neither adequate nor inadequate
  - No, information was inadequate
- 

Overall, was the text on the "NHS COVID-19" app simple and easy to understand?

- Easy
  - Neither easy nor difficult
  - Difficult
- 

Overall, was the "NHS COVID-19" app intuitive and easy to navigate through?

- Easy
  - Neither easy nor difficult
  - Difficult
-



Overall, how would you rate the style/interface of the "NHS COVID-19" app?

- Like a great deal
  - Like somewhat
  - Neither like nor dislike
  - Dislike somewhat
  - Dislike a great deal
- 

Was the design/appearance of the "NHS COVID-19" app consistent across all the screens in the app?

- Always
  - Most of the time
  - About half the time
  - Sometimes
  - Never
- 

Through the "NHS COVID-19" app, was it always clear to you what your current "status" was? E.g. Whether you have been in contact with someone who self-reported COVID-19?

- Most of the time
  - About half the time
  - Rarely
-

Were you told to self-isolate for 14 days?

- Yes
- No
- 

After receiving the notification that you needed to self-isolate, how clear were the instructions on what to do next?

- Extremely clear
- Neither clear nor unclear
- Unclear
- 

If you booked a COVID-19 test through the "NHS COVID-19" app, did you find this to be a straight forward process?

- Yes, the app walked me through the process
- No, I was very confused
- No, I didn't need to book a test
- 

Did you read all the information presented on the screens of the "NHS COVID-19" app?

- Yes, I read all the information
- No, I skipped through the screens
-

Did you ever require information from outside the "NHS COVID-19" app (NHS website, news articles, social media, etc.) to further understand the app?

Yes

No

---

Do you understand how the "NHS COVID-19" app assigns "risk levels" to your area?

Yes

No

---

Did you ever change your behavior, based on the assigned risk-level to your area?

Yes

No

How comfortable in terms of privacy and security, were you with the idea of checking into venues using the "NHS COVID-19" app?

Comfortable

Neither comfortable nor uncomfortable

Uncomfortable

---

Do you believe data collected from the "NHS COVID-19" app is secure?

- Yes
- Unsure
- No
- 

How comfortable in terms of privacy and security are you with the idea of self-reporting in the "NHS COVID-19" app?

- Comfortable
- Neither comfortable nor uncomfortable
- Uncomfortable
- 

Did you read the privacy policy?

- Yes
- No

I believe the "NHS COVID-19" app requires personal information to function. Please answer to the best of your knowledge.

- Yes
- Maybe
- No
- I don't know
-

What technology do you believe the "NHS COVID-19" app uses to register close contacts?  
Please answer to the best of your knowledge.

- GPS
  - Bluetooth
  - Wifi-Logs
  - Self-check in logs
- 

I believe the government is able to track my location using this app. Please answer to the best of your knowledge.

- Yes
  - Maybe
  - No
  - I don't know
- 

I believe the Venues I check into using the "NHS COVID-19" app are provided with my personal information. Please answer to the best of your knowledge.

- Yes
  - Maybe
  - No
  - I don't know
-

I believe that the "NHS COVID-19" app will alert me if someone I encountered, who was registered as a "close contact", self-reported a positive COVID-19 test. Please answer to the best of your knowledge.

- Definitely yes
- Probably yes
- Might or might not
- Probably not
- Definitely not
- I don't know

What would you have done differently in the "NHS COVID-19" app?

---

---

---

---

---

---

Any further comments?

---

---

---

---

---
